# Supplementary material for: Colorimetric detection of single-nucleotide mutations based on rolling circle amplification and G-quadruplex-based DNAzyme
Source: Royal Society of Chemistry journal article supplement (doi:10.1039/d4ay01080a), 2024-01-01
Supplement: d4ay01080a1.pdf [file d4ay01080a1.pdf]

## Supporting Information

### **Colorimetric detection of single-nucleotide mutation based on rolling circle amplification and G-quadruplex-based DNAzyme**

Serge Yannick OUEDRAOGO<sup>a,b,1</sup>, Moutanou Modeste Judes ZEYE<sup>c,1</sup>, Xi Zhou<sup>a</sup>,  
Touwendpoulimdé Isabelle KIENDREBEOGO<sup>b</sup>, Abdou Azaque ZOURE<sup>b,d</sup>, Hanchun  
Chen<sup>a</sup>, Fangzhi Chen<sup>e,\*</sup>, Changbei Ma<sup>a,\*</sup>

<sup>a</sup>Department of Biochemistry and Molecular Biology, School of Life Sciences, Central South University, Changsha 410013, Hunan, China

<sup>b</sup>Biomolecular Research Center Pietro Annigoni (CERBA)/LABIOGENE, University of Ouaga 1 Pr Joseph KI ZERBO, UFR/SVT, Burkina Faso

<sup>c</sup>Department of medical parasitology, School of Basic Medicine, Central South University, Changsha 410013, Hunan, China

<sup>d</sup>Institute of Health Sciences Research (IRSS/CNRST)/Department of Biomedical and Public Health, Burkina Faso

<sup>e</sup>Department of Urology, The Second Xiangya Hospital of Central South University, Changsha 410007, Hunan, China

<sup>1</sup>These authors have contributed equally to this work

\*Corresponding authors: E-mail: [macb2012@csu.edu.cn](mailto:macb2012@csu.edu.cn) (C. Ma); [fzc202@126.com](mailto:fzc202@126.com) (F. Chen)

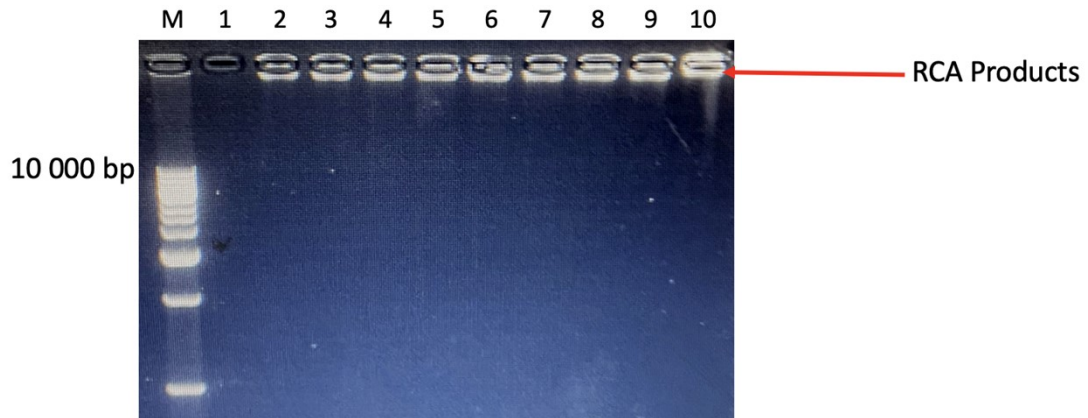

**Fig. S1.** Electrophoresis gel analysis of RCA products in the sensitivity assay. Lane 1 (0 nM of target DNA used), Lane 2 (0.01 nM), Lane 3 (0.1 nM), Lane 4 (0.5 nM), Lane 5 (1 nM), Lane 6 (10 nM), Lane 7 (50 nM), Lane 8 (100 nM), Lane 9 (500 nM), Lane 10 (1000 nM).

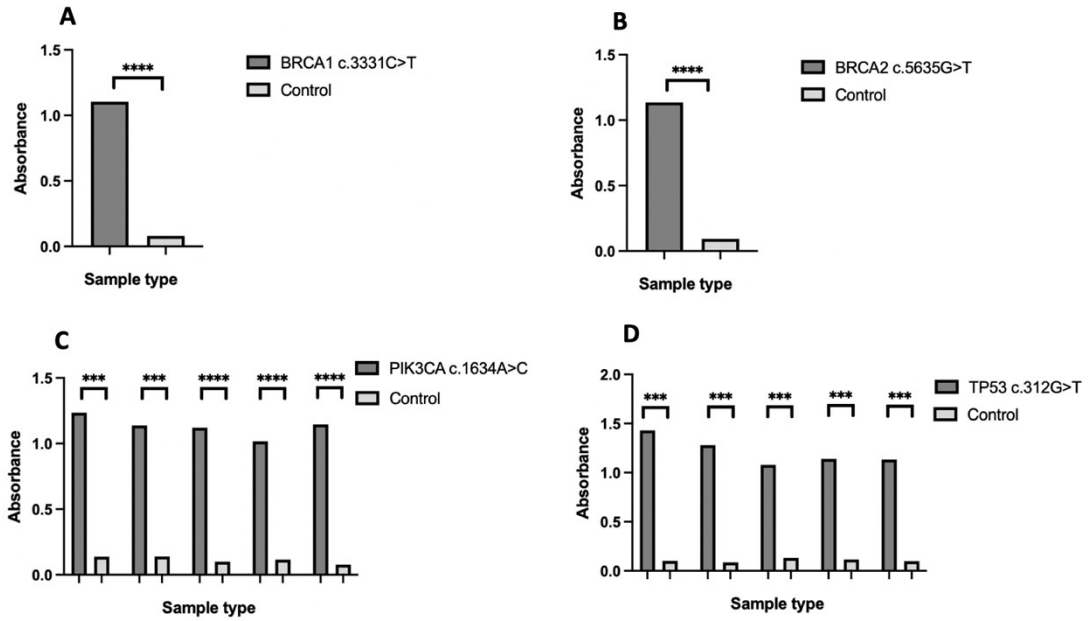

**Fig.S2.** Absorbance graphs for the mutation detection in breast cancer samples. (A) Graph showing the absorbance values of the mutant BRCA1 c.331C>T sample and a control WT sample. (B) Graph showing the absorbance values of the mutant BRCA2 c.5635G>T sample and a control WT sample. (C) Graph showing the absorbance values of mutant PIK3CA c.1634A>C samples and control WT samples. (D) Graph showing the absorbance values of mutant TP53 c.312G>T samples and control WT samples. All \*P<0.05, \*\*P<0.01, \*\*\*P<0.001, \*\*\*\*P<0.0001. The data are presented as the average and the error bars show the SD of 3 replicated experiments.

**Table S1.** Oligonucleotide sequences (5' to 3')

| Targeted Mutation            | Sequence* (5' → 3')                                                                  | Size (nt) |
|------------------------------|--------------------------------------------------------------------------------------|-----------|
| <b>BRCA1</b><br>(c.3331C>T)  | p <i>TTCTTATACTTCTCCCTAACCCCTAACCCCTAACCCGACT</i><br>TTATTTTTTCA                     | 49        |
| <b>BRCA2</b><br>(c.5635G>T)  | p <i>TCTTATTAGTTTTCCCTAACCCCTAACCCCTAACCCATT</i><br>CCTTTTGTGA                       | 49        |
| <b>PIK3CA</b><br>(c.1634A>C) | p <i>CAGTGATTTCCCCTAACCCCTAACCCCTAACCCCTTCTCC</i><br>TGCG                            | 41        |
| <b>TP53 (c.312G&gt;T)</b>    | p <i>CCGTCGATGCCAAACCCTAACCCCTAACCCCTAACCCCTC</i><br>TTTTGGATGGTA                    | 49        |
| <b>BRCA1</b><br>(c.3331C>T)  | TAGGGAGAAGTATAAGAA                                                                   | 18        |
| <b>BRCA2</b><br>(c.5635G>T)  | TAGGGAAAACCTAAATAAGA                                                                 | 19        |
| <b>PIK3CA</b><br>(c.1634A>C) | TAGGGGAAATCACTG                                                                      | 15        |
| <b>TP53 (c.312G&gt;T)</b>    | TAGGGTTTGGCATCGACGG                                                                  | 19        |
| <b>BRCA1</b><br>(c.3331C>T)  | CTGAAATAAAAAAGC/ <u>TAAGAATATGAAGA</u>                                               | 29/29     |
| <b>BRCA2</b><br>(c.5635G>T)  | TAAGGAAAACAACG/ <u>TAGAATAAATCAAAA</u>                                               | 29/29     |
| <b>PIK3CA</b><br>(c.1634A>C) | GAAATCACTGA/ <u>CGCAGGAGAA</u>                                                       | 21/21     |
| <b>TP53 (c.312G&gt;T)</b>    | AGAAAACCTACCAG/ <u>TGGCAGCTACGGTTT</u>                                               | 29/29     |
| <b>BRCA1</b><br>(c.3331C>T)  | Forward primer: pTTAGGGGTTTTGCAACCTGAG<br>Reverse primer: TAAGTTATCTGAAATCAGATAT     | 21<br>22  |
| <b>BRCA2</b><br>(c.5635G>T)  | Forward primer: pTTTGTGTTTCACATGAAACAATT<br>Reverse primer: ATCTAGAGAGTTATGAAGAATATC | 23<br>24  |
| <b>PIK3CA</b><br>(c.1634A>C) | Forward primer: pTGAATTAAGGGAAAATGA<br>Reverse primer: CTGTGACTCCATAGAAAAT           | 18<br>19  |
| <b>TP53 (c.312G&gt;T)</b>    | Forward primer: pTGCACCAGCCCCCTCCTGGC<br>Reverse primer: GTGCAAGTCACAGACTTGGCT       | 20<br>21  |

\*Red segment, C-rich region; Italic segment, RCA primer binding site; Bold segment, mutant recognition site; p, phosphorylation; nt, nucleotides; Underline, wild-type and mutant type sequence, respectively.

**Table S2.** Mutations and real BC samples number detected

| <b>Genes</b>              | <b>Variants</b> | <b>BC samples detected</b> |
|---------------------------|-----------------|----------------------------|
| <b>BRCA1<sup>a</sup></b>  | c.3331C>T       | 1                          |
| <b>BRCA2<sup>b</sup></b>  | c.5635G>T       | 1                          |
| <b>PIK3CA<sup>c</sup></b> | c.1634A>C       | 5                          |
| <b>TP53<sup>d</sup></b>   | c.312G>T        | 5                          |
| <b>Control_BRCA1</b>      | -               | 5                          |
| <b>Control_BRCA2</b>      | -               | 5                          |
| <b>Control_PIK3CA</b>     | -               | 5                          |
| <b>Control_TP53</b>       | -               | 5                          |

<sup>a</sup>BRCA1 reference sequence NCBI RefSeq NM\_007294.3 (mRNA) and NP\_009225.1 (protein)

<sup>b</sup>BRCA2 reference sequence NCBI RefSeq NM\_000059.3 (mRNA) and NP\_000050.2 (protein)

<sup>c</sup>PIK3CA reference sequence NCBI RefSeq NM\_006218.2 (mRNA) and NP\_006209.2 (protein)

<sup>d</sup>TP53 reference sequence NCBI RefSeq NM\_000546.5 (mRNA) and NP\_000537.3 (protein)

Controls: Samples obtained from patients who did not harbor any of the mutations mentioned above.
